# Supplementary material for: Interaction of rac-[Cu(diimine)3]2+ and rac-[Zn(diimine)3]2+ complexes with CT DNA: effect of fluxional Cu(ii) geometry on DNA binding, ligand–promoted exciton coupling and prominent DNA cleavage
Source: Royal Society of Chemistry journal article supplement (doi:10.1039/b801497c), 2008-01-01

## Supporting Informations

### Electronic Absorption and EPR Spectra.

The complex  $[\text{Cu}(5,6\text{-dmp})_3]^{2+}$  **2** in 10% DMF/5 mM Tris-HCl/50 mM NaCl aqueous buffer solution shows a broad ligand field band around 680 nm (Table S1), which is in agreement with the square based geometry observed in its X-ray crystal structure. The phen (**1**) and dpq (**3**) analogues also show a single LF spectral feature around 712 and 728 nm (Table S1). The higher LF energy of **2** is expected of its stronger Cu-N bond (cf. above). The ligand-based bands are observed around 267 (**1**), 280 (**2**) and 296 nm (**3**). The analogues Zn(II) complexes also exhibit ligand-based bands around values closer to their Cu(II) analogues. The EPR spectra of **1** – **3** in frozen  $\text{CH}_3\text{CN}:\text{acetone}$  solutions are axial  $[g_{\parallel} > g_{\perp} > 2.023, G = (g_{\parallel}-2)/(g_{\perp}-2) \approx 3.8]$ <sup>1</sup>, which is in agreement with the absorption spectral data and the X-ray crystal structures of **1** and **2**. The  $g_{\parallel}$  and  $A_{\parallel}$  values expected for a  $\text{CuN}_4$  chromophore<sup>1</sup> are respectively 2.200 and  $200 \times 10^{-4} \text{ cm}^{-1}$  and the  $g_{\parallel}$  value is expected to increase and the  $A_{\parallel}$  value to decrease on strong axial interaction by nitrogen. Thus the EPR spectral parameters of the present complexes ( $g_{\parallel}$  2.264 – 2.278;  $A_{\parallel}$  161 –  $174 \times 10^{-4} \text{ cm}^{-1}$ ) are consistent with the tetragonal distortion observed in the X-ray structure and the value of the structural index  $g_{\parallel}/A_{\parallel}$  quotient (**1**, 140; **2**, 130; **3**, 141 cm) is consistent with the planarity of  $\text{CuN}_4$  basal plane of the complexes.

### Reference

1. M. Palaniandavar, T. Pandian, M. Lakshminarayanan and H. Manohar, *J. C. S. Dalton Trans.*, 1995, 455.

**Table S1.** Electronic absorption and EPR spectral properties <sup>a</sup> of Cu(II) and Zn(II) complexes

| Complex                                   |          | $\lambda_{\text{max}}$ in nm ( $\epsilon$ , $\text{M}^{-1} \text{cm}^{-1}$ ) |                            | EPR spectra <sup>d</sup>           |              |
|-------------------------------------------|----------|------------------------------------------------------------------------------|----------------------------|------------------------------------|--------------|
|                                           |          | Ligand field <sup>b</sup>                                                    | Ligand based <sup>c</sup>  |                                    |              |
| [Cu(phen) <sub>3</sub> ] <sup>2+</sup>    | <b>1</b> | 712 (108)                                                                    | 267 (90150)<br>294 sh      | $g_{\parallel}$<br>$A_{\parallel}$ | 2.278<br>164 |
|                                           |          |                                                                              |                            | $g_{\perp}$                        | 2.073        |
| [Cu(5,6-dmp) <sub>3</sub> ] <sup>2+</sup> | <b>2</b> | 680 (58)                                                                     | 280 (679840)<br>351 sh     | $g_{\parallel}$<br>$A_{\parallel}$ | 2.264<br>174 |
|                                           |          |                                                                              |                            | $g_{\perp}$                        | 2.084        |
| [Cu(dpq) <sub>3</sub> ] <sup>2+</sup>     | <b>3</b> | 728 (99)                                                                     | 254 (60858)<br>296 sh      | $g_{\parallel}$<br>$A_{\parallel}$ | 2.270<br>161 |
|                                           |          |                                                                              |                            | $g_{\perp}$                        | 2.084        |
| [Zn(phen) <sub>3</sub> ] <sup>2+</sup>    | <b>4</b> | —                                                                            | 267 (30500)<br>230 (32300) | —                                  | —            |
| [Zn(5,6-dmp) <sub>3</sub> ] <sup>2+</sup> | <b>5</b> | —                                                                            | 278 (91260)<br>298 (95460) | —                                  | —            |
| [Zn(dpq) <sub>3</sub> ] <sup>2+</sup>     | <b>6</b> | —                                                                            | 255(55465)                 | —                                  | —            |

<sup>a</sup>In DMF - buffer solution. <sup>b</sup>Concentration,  $5 \times 10^{-3} \text{ mol.dm}^{-3}$ . <sup>c</sup> Concentration,  $2 \times 10^{-5} \text{ mol.dm}^{-3}$ . <sup>d</sup> Acetonitrile/acetone (4:1 V/V) glass at 77 K,  $A_{\parallel}$  in  $10^{-4} \text{ cm}^{-1}$ .

**Table S2.** Electrochemical behaviour of <sup>a</sup> the copper(II) complexes on interaction with CT DNA  
 at R = [DNA]/[Cu] = 3

| Complexes                                          | R | $E_{pa}$ (V) | $E_{pc}$ (V) | $E_{1/2}$ (V) |                  | $\Delta E_p$ (mV) | $K_{2+}/K_+$ |
|----------------------------------------------------|---|--------------|--------------|---------------|------------------|-------------------|--------------|
|                                                    |   |              |              | CV            | DPV <sup>b</sup> |                   |              |
| [Cu(phen) <sub>3</sub> ] <sup>2+</sup> <b>1</b>    | 0 | 0.040        | -0.084       | 0.022         | 0.021            | 124               | 1.17         |
|                                                    | 3 | 0.038        | -0.066       | 0.014         | 0.017            | 104               |              |
| [Cu(5,6-dmp) <sub>3</sub> ] <sup>2+</sup> <b>2</b> | 0 | -0.004       | -0.098       | -0.051        | -0.031           | 94                | 3.49         |
|                                                    | 3 | -0.014       | -0.102       | -0.063        | -0.063           | 88                |              |
| [Cu(dpq) <sub>3</sub> ] <sup>2+</sup> <b>3</b>     | 0 | 0.118        | 0.006        | 0.062         | 0.065            | 112               | 1.78         |
|                                                    | 3 | 0.110        | 0.036        | 0.073         | 0.072            | 146               |              |

<sup>a</sup> Measured vs. sat. calomel electrode, using glassy carbon electrode scan rate, 50 mV<sup>-1</sup>; supporting electrolyte 10% DMF : 5 mM Tris-HCl/50 mM NaCl; Complex concentration: 5 x 10<sup>-4</sup> mol.dm<sup>3</sup> ;

<sup>b</sup> Differential pulse voltammetry (DPV), scan rate 1 mV s<sup>-1</sup>, pulse height 50 mV.

**Table S3.** Concentration dependent oxidative cleavage data of SC pUC19 DNA (40  $\mu\text{M}$ , in base pair) by complexes **2** in the presence of ascorbic acid.

| Serial no | Reaction conditions                | Form (%) |      |
|-----------|------------------------------------|----------|------|
|           |                                    | SC       | NC   |
| 1         | DNA control                        | 91.8     | 8.2  |
| 2         | DNA + $\text{H}_2\text{A}$         | 90.8     | 9.2  |
| 3         | DNA + <b>2</b> (10 $\mu\text{M}$ ) | 86.8     | 13.2 |
| 4         | DNA + <b>2</b> (20 $\mu\text{M}$ ) | 83.4     | 16.6 |
| 5         | DNA + <b>2</b> (30 $\mu\text{M}$ ) | 52.8     | 47.2 |
| 6         | DNA + <b>2</b> (40 $\mu\text{M}$ ) | 45.8     | 54.2 |
| 7         | DNA + <b>2</b> (50 $\mu\text{M}$ ) | 43.0     | 57.0 |

**Table S4.** Concentration dependent oxidative cleavage data of SC pUC19 DNA (40  $\mu\text{M}$ , in base pair) by complexes **3** (30  $\mu\text{M}$ ) in the presence of ascorbic acid.

| Serial no | Reaction conditions                | Form(%) |      |
|-----------|------------------------------------|---------|------|
|           |                                    | SC      | NC   |
| 1         | DNA control                        | 91.8    | 8.2  |
| 2         | DNA + $\text{H}_2\text{A}$         | 90.8    | 9.2  |
| 3         | DNA + <b>3</b> (10 $\mu\text{M}$ ) | 2.3     | 97.7 |
| 4         | DNA + <b>3</b> (20 $\mu\text{M}$ ) | 1.3     | 98.7 |
| 5         | DNA + <b>3</b> (30 $\mu\text{M}$ ) | 0.3     | 99.7 |
| 6         | DNA + <b>3</b> (40 $\mu\text{M}$ ) | -       | -    |
| 7         | DNA + <b>3</b> (50 $\mu\text{M}$ ) | -       | -    |

**Figure S1.** The effect of CT DNA on the absorption spectra of complexes of **1 - 6** ( $R = [\text{DNA}]/[\text{complex}] = 25$ ).

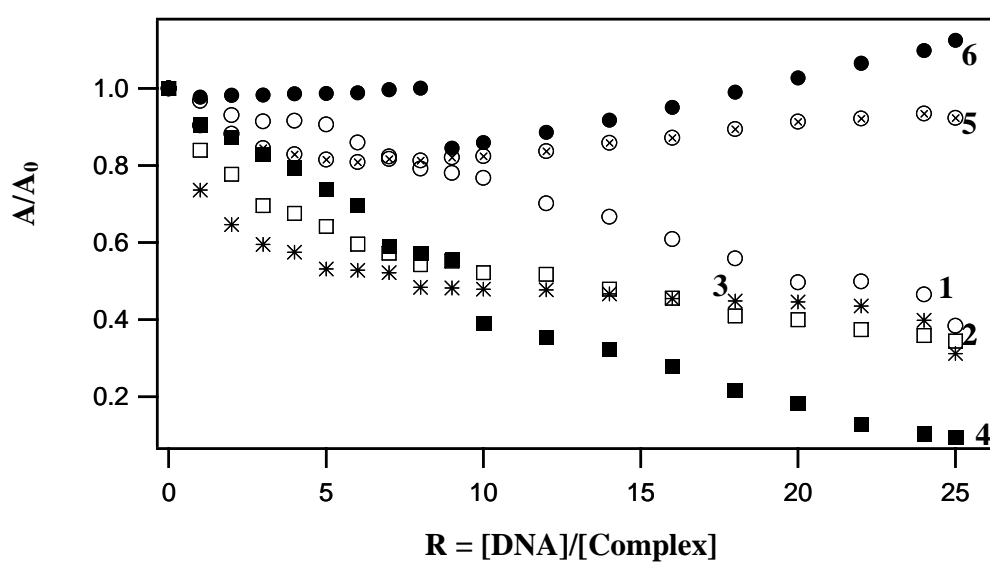

**Figure S2.** Effect of addition of complex **2** and **5** on the CD intensity of the CT DNA at different complex concentrations in a 5mM Tris-HCl/ 50 mM NaCl buffer at pH = 7.1 at 25 °C

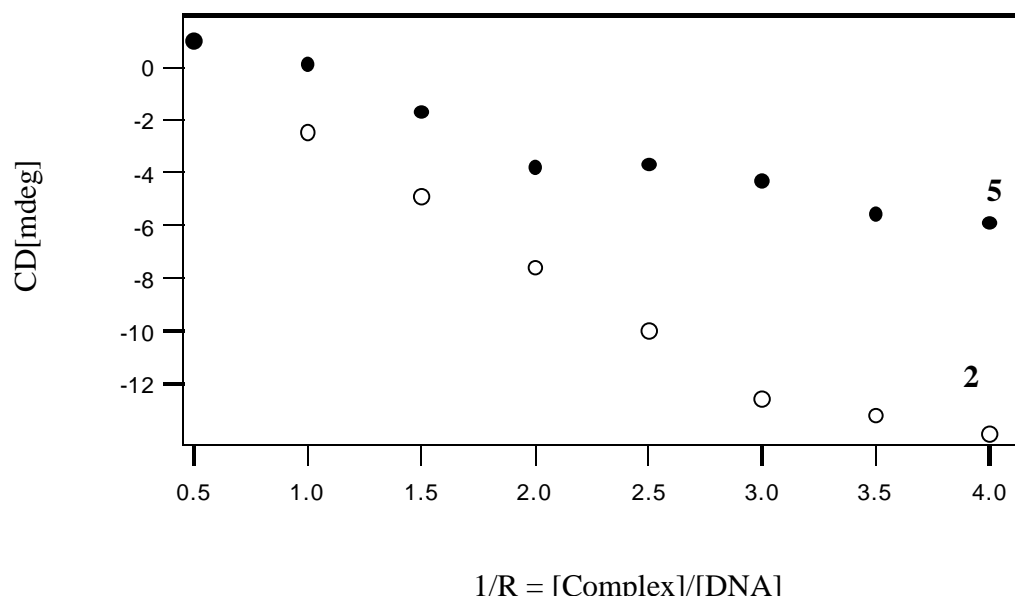

**Figure S3A** Circular Dichroism spectra of CT DNA in the absence (a) and presence of (b)  $[\text{Cu}(\text{phen})_3]^{2+}$  ( $1/R = 2$ ); Conc. of CT DNA =  $2 \times 10^{-5} \text{ mol.dm}^3$

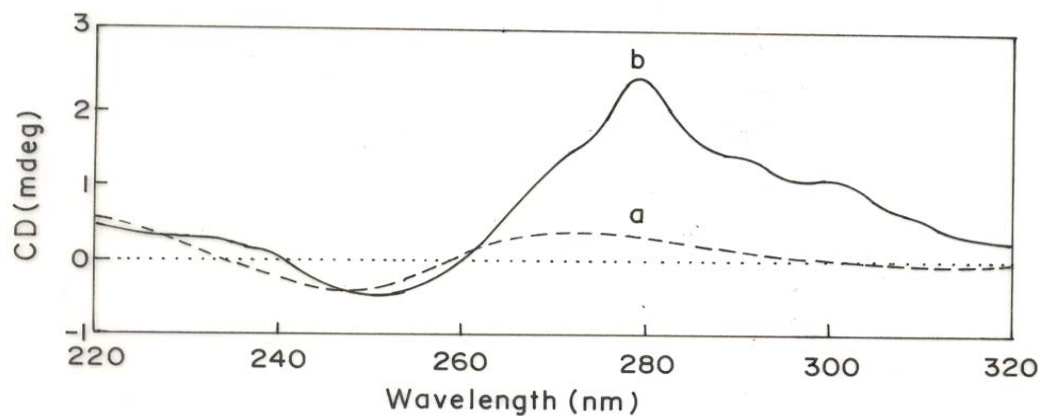

**Figure S3B** Circular Dichroism spectra of CT DNA in the absence (a) and presence of (b)  $[\text{Zn}(\text{phen})_3]^{2+}$  ( $1/R = 2$ ); Conc. of CT DNA =  $2 \times 10^{-5} \text{ mol.dm}^3$

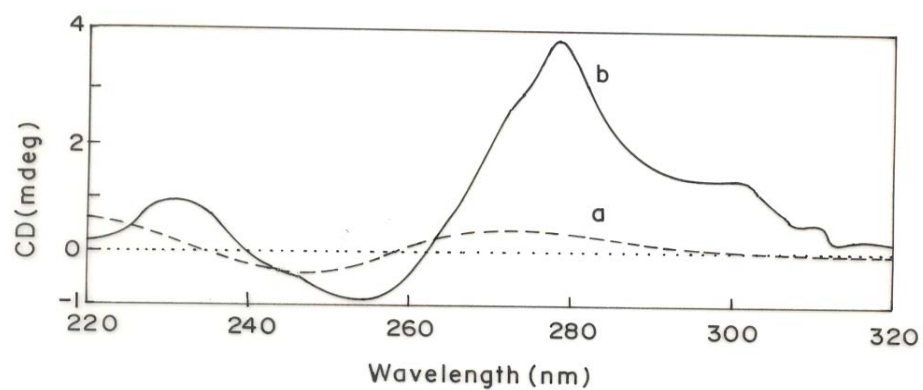

**Figure S4.** Circular Dichroism spectra of CT DNA, d(AT)<sub>12</sub>, d(GC)<sub>12</sub> and d(GTCGAC)<sub>2</sub> in the absence (a) and presence of the *rac*-[Zn(5,6-dmp)<sub>3</sub>]<sup>2+</sup> (b) Conc of the oligonucleotides =  $2 \times 10^{-5}$  mol.dm<sup>3</sup> ; Cell length = 0.2 cm

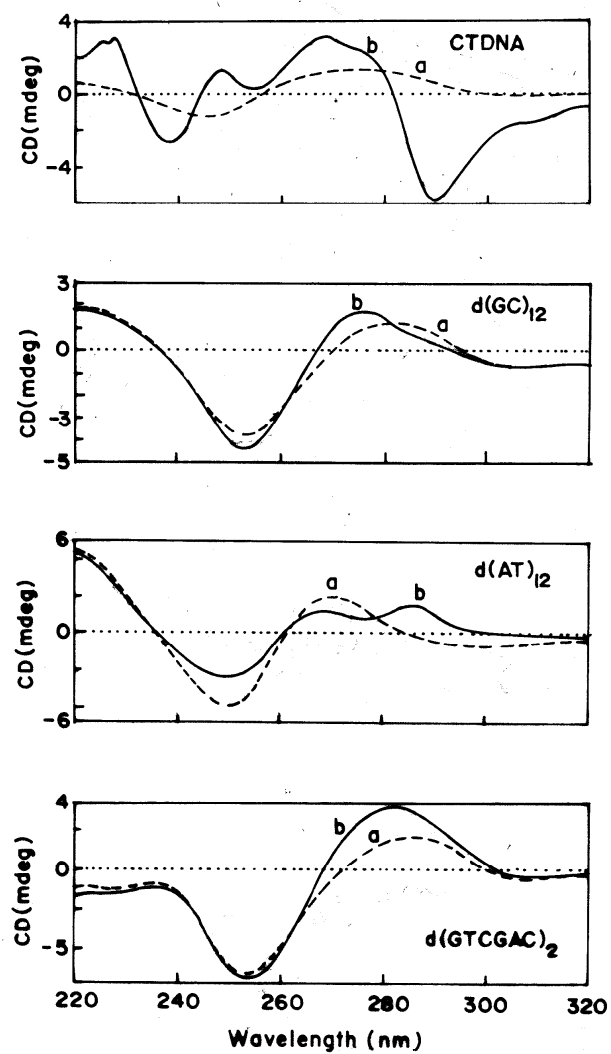



**Figure S5A.** Circular Dichroism spectra of CT DNA in the absence (a) and presence of *rac*-[Cu(5,6-dmp)<sub>3</sub>]<sup>2+</sup> at 1/R = 2 (b) and of CT DNA incubated with EthBr in the presence of *rac*-[Cu(5,6-dmp)<sub>3</sub>]<sup>2+</sup> at 1/R = 2 (c). Conc. of CT DNA = 2 x 10<sup>-5</sup> mol.dm<sup>3</sup>.

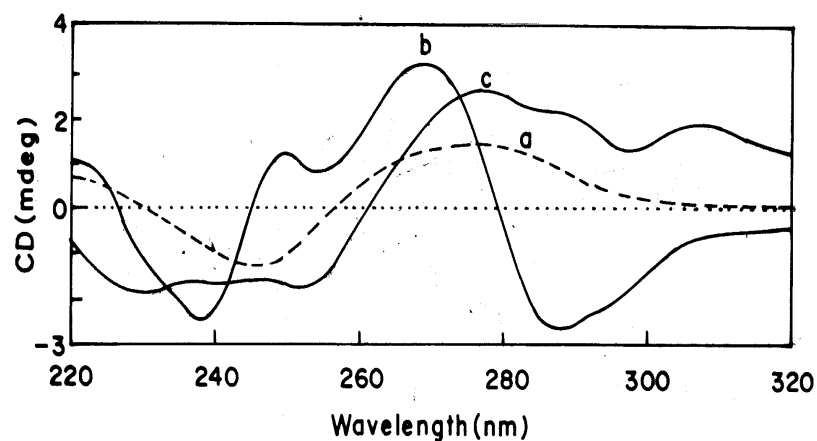

**Figure S5B.** Circular Dichroism spectra of CT DNA in the absence (a) and presence of *rac*-[Zn(5,6-dmp)<sub>3</sub>]<sup>2+</sup> at 1/R = 2 (b) and of CT DNA incubated with EthBr in the presence of *rac*-[Zn(5,6-dmp)<sub>3</sub>]<sup>2+</sup> at 1/R = 2 (c). Conc. of CT DNA = 2 x 10<sup>-5</sup> mol.dm<sup>3</sup>.

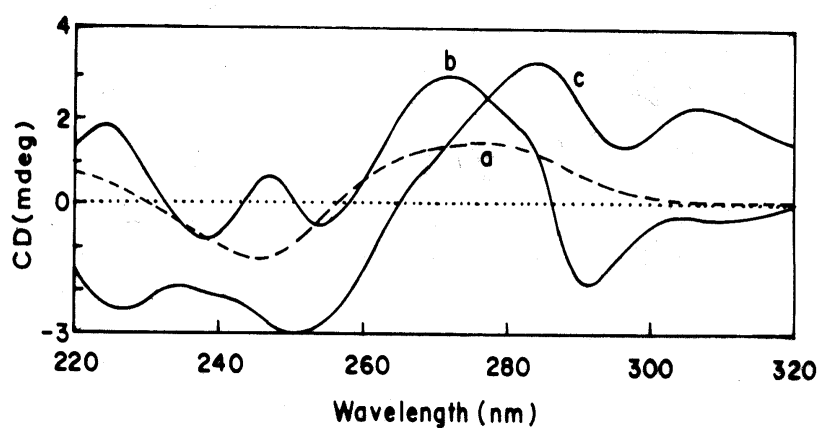

**Figure S6A.** Circular Dichroism spectra of CT DNA in the absence (a) and presence of *rac*-[Cu(5,6-dmp)<sub>3</sub>]<sup>2+</sup> at 1/R = 2 (b) and of CT DNA incubated with *rac*-[Cu(phen)<sub>3</sub>]<sup>2+</sup> in the presence of *rac*-[Cu(5,6-dmp)<sub>3</sub>]<sup>2+</sup> at 1/R = 2 (c). Conc. of CT DNA = 2 x 10<sup>-5</sup> mol.dm<sup>3</sup>.

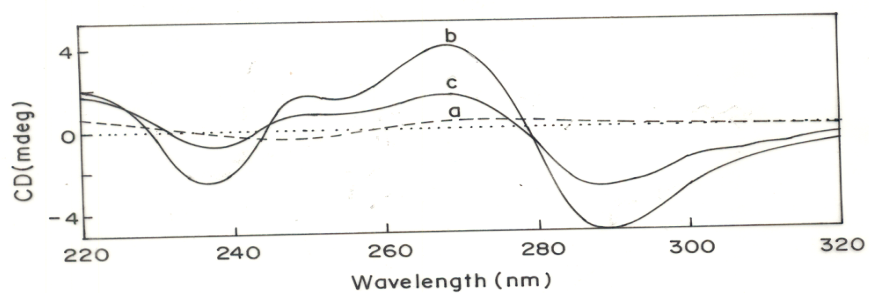

**Figure S6B.** Circular Dichroism spectra of CT DNA in the absence (a) and presence of *rac*-[Cu(phen)<sub>3</sub>]<sup>2+</sup> at 1/R = 2 (b) and of CT DNA incubated with *rac*-[Cu(5,6-dmp)<sub>3</sub>]<sup>2+</sup> in the presence of *rac*-[Cu(phen)<sub>3</sub>]<sup>2+</sup> at 1/R = 2 (c). Conc. of CT DNA = 2 x 10<sup>-5</sup> mol.dm<sup>3</sup>.

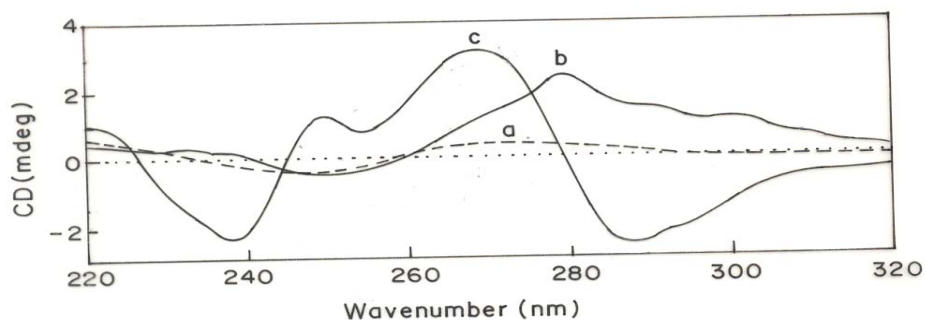

**Figure S7A.** Circular Dichroism spectra of CT DNA in the absence (a) and presence of *rac*-[Zn(5,6-dmp)<sub>3</sub>]<sup>2+</sup> at 1/R = 2 (b) and of CT DNA incubated with *rac*-[Zn(phen)<sub>3</sub>]<sup>2+</sup> in the presence of *rac*-[Zn(5,6-dmp)<sub>3</sub>]<sup>2+</sup> at 1/R = 2 (c). Conc. of CT DNA = 2 x 10<sup>-5</sup> mol.dm<sup>3</sup>.

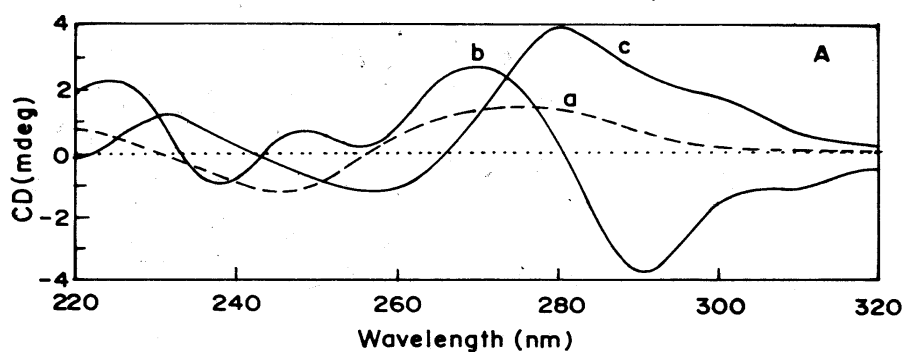

**Figure S7B.** Circular Dichroism spectra of CT DNA in the absence (a) and presence of *rac*-[Zn(phen)<sub>3</sub>]<sup>2+</sup> at 1/R = 2 (b) and of CT DNA incubated with *rac*-[Zn(5,6-dmp)<sub>3</sub>]<sup>2+</sup> in the presence of *rac*-[Zn(phen)<sub>3</sub>]<sup>2+</sup> at 1/R = 2 (c). Conc. of CT DNA = 2 x 10<sup>-5</sup> mol.dm<sup>3</sup>.

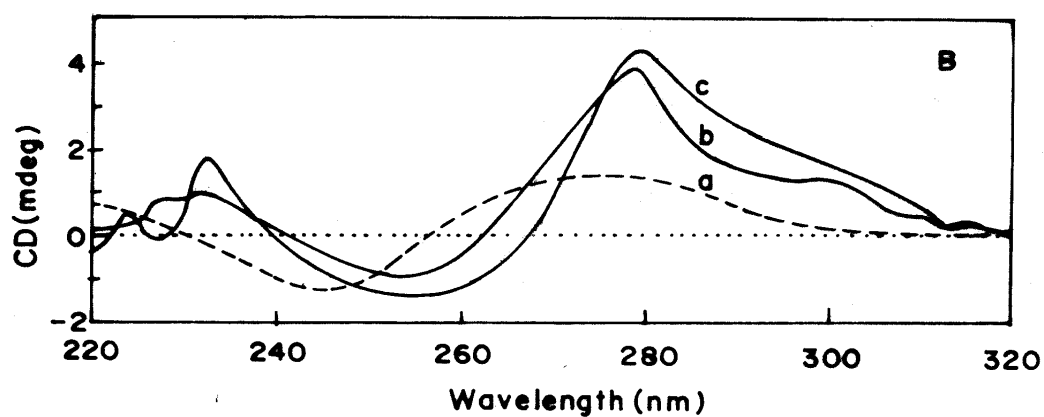

**Figure S8A.** Circular Dichroism spectra of CT DNA in the absence (a) and presence of *rac*-[Cu(5,6-dmp)<sub>3</sub>]<sup>2+</sup> at 1/R = 2 (b) and of CT DNA incubated with EDTA in the presence of *rac*-[Cu(5,6-dmp)<sub>3</sub>]<sup>2+</sup> at 1/R = 2 (c). Conc. of CT DNA = 2 x 10<sup>-5</sup> mol.dm<sup>3</sup>.

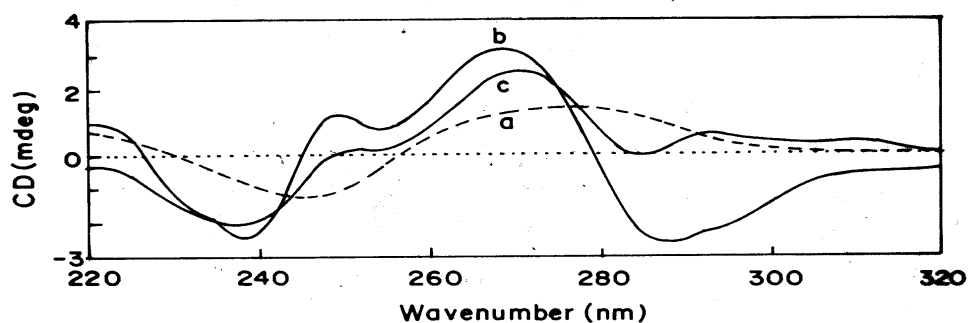

**Figure S8B.** Circular Dichroism spectra of CT DNA in the absence (a) and presence of *rac*-[Zn(5,6-dmp)<sub>3</sub>]<sup>2+</sup> at 1/R = 2 (b) and of CT DNA incubated with EDTA in the presence of *rac*-[Zn(5,6-dmp)<sub>3</sub>]<sup>2+</sup> at 1/R = 2 (c). Conc. of CT DNA = 2 x 10<sup>-5</sup> mol.dm<sup>3</sup>.

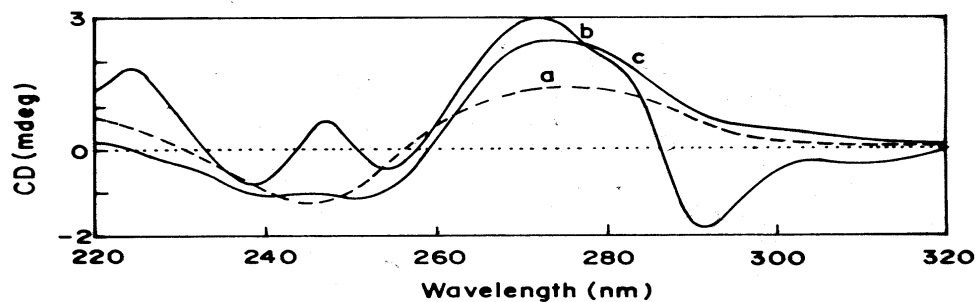

**Figure S9.** Cleavage of supercoiled pUC 19 DNA (40  $\mu\text{M}$ ) by the copper(II) complexes in 5% DMF : 5 mM Tris-HCl/50 mM NaCl at pH = 7.1 and 37  $^{\circ}\text{C}$  in the presence of ascorbic acid ( $\text{H}_2\text{A}$ , 10  $\mu\text{M}$ ) at 37  $^{\circ}\text{C}$ . Lane 1, DNA ; lane 2 + DNA +  $\text{H}_2\text{A}$ ; lane 3, DNA +  $[\text{Cu}(\text{phen})_2\text{Cl}]\text{Cl}$  +  $\text{H}_2\text{A}$ ; lane 4, DNA + **1** +  $\text{H}_2\text{A}$ ; lane 5, DNA +  $[\text{Cu}(5,6\text{-dmp})_2\text{Cl}]\text{Cl}$  +  $\text{H}_2\text{A}$ ; lane 6, DNA + **2** +  $\text{H}_2\text{A}$ ; Complex concentration is 30  $\mu\text{M}$  for lanes 2-7. Forms I and II are supercoiled and nicked circular forms of DNA respectively.

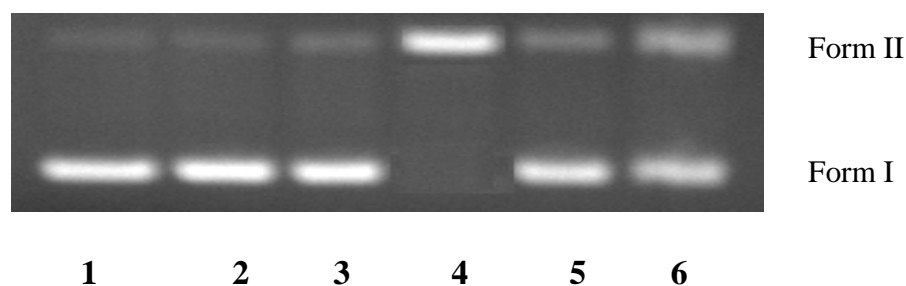

**Figure S10A.** Cleavage of supercoiled pUC19 DNA (40  $\mu\text{M}$ ) by complex **1** (10 – 30  $\mu\text{M}$ ) in 10% DMF / 5 mM Tris-HCl/50 mM NaCl at pH = 7.1 and 37  $^{\circ}\text{C}$  in the presence of ascorbic acid ( $\text{H}_2\text{A}$ , 10  $\mu\text{M}$ ) at 37  $^{\circ}\text{C}$ . Lane 1, + DNA +  $\text{H}_2\text{A}$ ; lane 2, DNA + **1** (10  $\mu\text{M}$ ) +  $\text{H}_2\text{A}$ ; lane 3, DNA + **1** (20  $\mu\text{M}$ ) +  $\text{H}_2\text{A}$ ; lane 4, DNA + **1** (30  $\mu\text{M}$ ) +  $\text{H}_2\text{A}$ ; lane 5, DNA + **1** (30  $\mu\text{M}$ ) +  $\text{H}_2\text{A}$  + 2  $\mu\text{L}$  DMSO; Lane 6, DNA + **1** (30  $\mu\text{M}$ ) +  $\text{H}_2\text{A}$  + Distamycin. Forms I and II are supercoiled and nicked circular forms of DNA respectively.

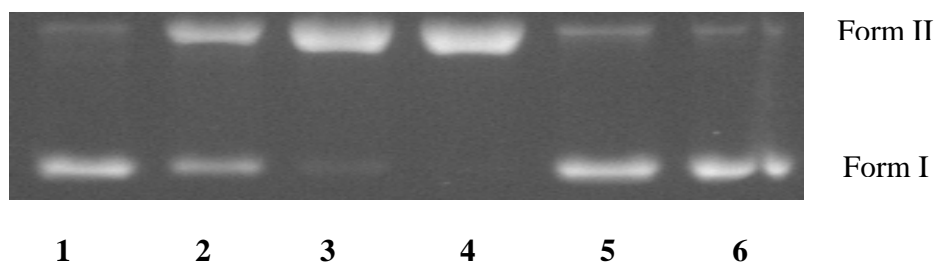

**Figure S10B.** Concentration dependent DNA (40  $\mu\text{M}$ ) cleavage by complex **1** (10 – 50  $\mu\text{M}$ ) in 10% DMF / 5 mM Tris-HCl/50 mM NaCl at pH = 7.1 and 37  $^{\circ}\text{C}$  in the presence of ascorbic acid ( $\text{H}_2\text{A}$ , 10  $\mu\text{M}$ ) at 37  $^{\circ}\text{C}$ . Lane 1, DNA ; lane 2, DNA +  $\text{H}_2\text{A}$ ; lane 3, DNA + **1** (10  $\mu\text{M}$ ) +  $\text{H}_2\text{A}$ ; lane 4, DNA + **1** (20  $\mu\text{M}$ ) +  $\text{H}_2\text{A}$ ; lane 5, DNA + **1** (30  $\mu\text{M}$ ) +  $\text{H}_2\text{A}$ ; lane 6, DNA + **1** (40  $\mu\text{M}$ ) +  $\text{H}_2\text{A}$ ; lane 7, DNA + **1** (50  $\mu\text{M}$ ) +  $\text{H}_2\text{A}$ ; Forms I and II are supercoiled and nicked circular forms of DNA respectively

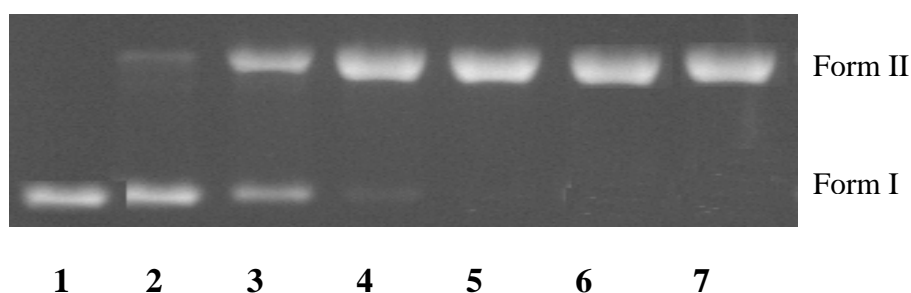

**Figure S10C.** Concentration dependent DNA (40  $\mu\text{M}$ ) cleavage by complex **1** (2 – 10  $\mu\text{M}$ ) in 10% DMF / 5 mM Tris-HCl/50 mM NaCl at pH = 7.1 and 37  $^{\circ}\text{C}$  in the presence of ascorbic acid ( $\text{H}_2\text{A}$ , 10  $\mu\text{M}$ ) at 37  $^{\circ}\text{C}$ . lane 1 + DNA +  $\text{H}_2\text{A}$ ; lane 2, DNA + **1** (2  $\mu\text{M}$ ) +  $\text{H}_2\text{A}$ ; lane3, DNA + **1** (4  $\mu\text{M}$ ) +  $\text{H}_2\text{A}$ ; lane 4, DNA + **1** (6  $\mu\text{M}$ ) +  $\text{H}_2\text{A}$ ; lane 5, DNA + **1** (10  $\mu\text{M}$ ) +  $\text{H}_2\text{A}$ ; lane 7, DNA + **1** (8  $\mu\text{M}$ ) +  $\text{H}_2\text{A}$ ; Forms I and II are supercoiled and nicked circular forms of DNA respectively

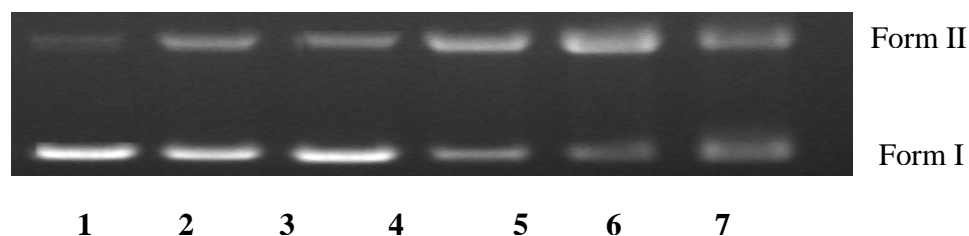

**Figure S11.** Concentration dependent DNA (40  $\mu\text{M}$ ) cleavage by the complex **2** (10 – 50  $\mu\text{M}$ ) in 5% DMF : 5 mM Tris-HCl/50 mM NaCl at pH = 7.1 and 37  $^{\circ}\text{C}$  in the presence of ascorbic acid ( $\text{H}_2\text{A}$ , 10  $\mu\text{M}$ ) at 37  $^{\circ}\text{C}$ . Lane 1, DNA ; lane 2, DNA +  $\text{H}_2\text{A}$ ; lane 3, DNA + **2** (10  $\mu\text{M}$ ) +  $\text{H}_2\text{A}$ ; lane 4, DNA + **2** (20  $\mu\text{M}$ ) +  $\text{H}_2\text{A}$ ; lane 5, DNA + **2** (30  $\mu\text{M}$ ) +  $\text{H}_2\text{A}$ ; lane 6, DNA + **2** (40  $\mu\text{M}$ ) +  $\text{H}_2\text{A}$ ; lane 7, DNA + **2** (50  $\mu\text{M}$ ) +  $\text{H}_2\text{A}$ ; ; lane 8, DNA + **2** (30  $\mu\text{M}$ ) +  $\text{H}_2\text{A}$  + 2  $\mu\text{L}$  DMSO; Lane 9, DNA + **2** (30  $\mu\text{M}$ ) +  $\text{H}_2\text{A}$  + Distamycin. Forms I and II are supercoiled and nicked circular forms of DNA respectively.

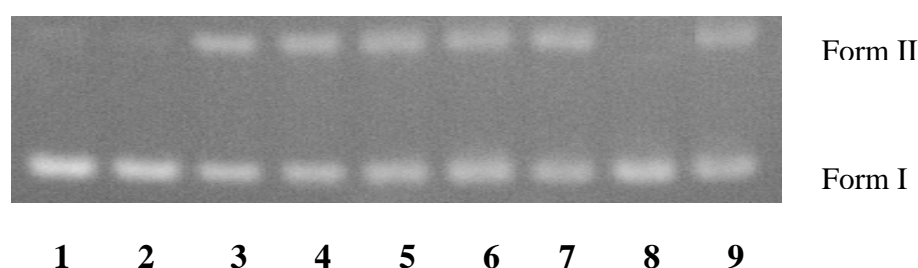

**Figure S12.** Concentration dependent DNA (40  $\mu\text{M}$ ) cleavage by the complex **3** (2 – 10  $\mu\text{M}$ ) in 10% DMF 5 mM Tris-HCl/50 mM NaCl at pH = 7.1 and 37  $^{\circ}\text{C}$  in the presence of ascorbic acid ( $\text{H}_2\text{A}$ , 10  $\mu\text{M}$ ) at 37  $^{\circ}\text{C}$ . Lane 1, DNA ; lane 2, DNA +  $\text{H}_2\text{A}$ ; lane 3, DNA + **3** (2  $\mu\text{M}$ ) +  $\text{H}_2\text{A}$ ; lane 4, DNA + **3** (4  $\mu\text{M}$ ) +  $\text{H}_2\text{A}$ ; lane 5, DNA + **3** (6  $\mu\text{M}$ ) +  $\text{H}_2\text{A}$ ; lane 6, DNA + **3** (8  $\mu\text{M}$ ) +  $\text{H}_2\text{A}$ ; lane 7, DNA + **3** (10  $\mu\text{M}$ ) +  $\text{H}_2\text{A}$ ; Forms I and II are supercoiled and nicked circular forms of DNA respectively

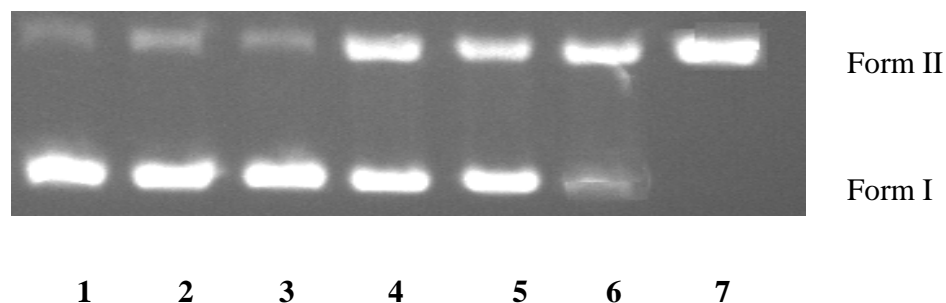

**Figure S13.** Concentration dependent DNA (40  $\mu\text{M}$ ) cleavage by the  $[\text{Cu}(\text{dpq})_2\text{Cl}]^{2+}$  complex (2 – 10  $\mu\text{M}$ ) in 5% DMF : 5 mM Tris-HCl/50 mM NaCl at pH = 7.1 and 37  $^\circ\text{C}$  in the presence of ascorbic acid ( $\text{H}_2\text{A}$ , 10  $\mu\text{M}$ ) at 37  $^\circ\text{C}$ . Lane 1, DNA ; lane 2 , DNA +  $\text{H}_2\text{A}$ ; lane 3, DNA +  $[\text{Cu}(\text{dpq})_2\text{Cl}]^{2+}$  (2  $\mu\text{M}$ ) +  $\text{H}_2\text{A}$ ; lane 4, DNA +  $[\text{Cu}(\text{dpq})_2\text{Cl}]^{2+}$  (4  $\mu\text{M}$ ) +  $\text{H}_2\text{A}$ ; lane 5, DNA +  $[\text{Cu}(\text{dpq})_2\text{Cl}]^{2+}$  (6  $\mu\text{M}$ ) +  $\text{H}_2\text{A}$ ; lane 6, DNA +  $[\text{Cu}(\text{dpq})_2\text{Cl}]^{2+}$  (8  $\mu\text{M}$ ) +  $\text{H}_2\text{A}$ ; lane 7, DNA +  $[\text{Cu}(\text{dpq})_2\text{Cl}]^{2+}$  (10  $\mu\text{M}$ ) +  $\text{H}_2\text{A}$ .

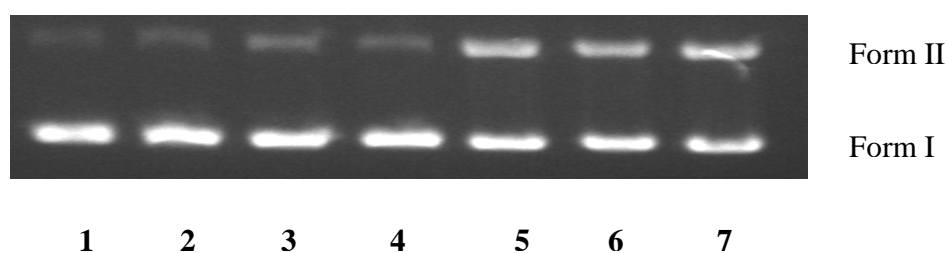

**Figure S14.** Cleavage of supercoiled pUC19 DNA (40  $\mu\text{M}$ ) by 10  $\mu\text{M}$  complex (**1** – **3**) in 10% DMF / 5 mM Tris-HCl/50 mM NaCl at pH = 7.1 and 37  $^\circ\text{C}$  in the presence of  $\text{H}_2\text{O}_2$  (200  $\mu\text{M}$ ) at 37  $^\circ\text{C}$ . Lane 1, DNA ; lane 2, DNA +  $\text{H}_2\text{O}_2$  ; lane 3, DNA +  $\text{H}_2\text{O}_2$  + **1**; lane 4, DNA +  $\text{H}_2\text{O}_2$  + **3**; lane 5, DNA +  $\text{H}_2\text{O}_2$  + **2**. Forms I and II are supercoiled and nicked circular forms of DNA respectively.

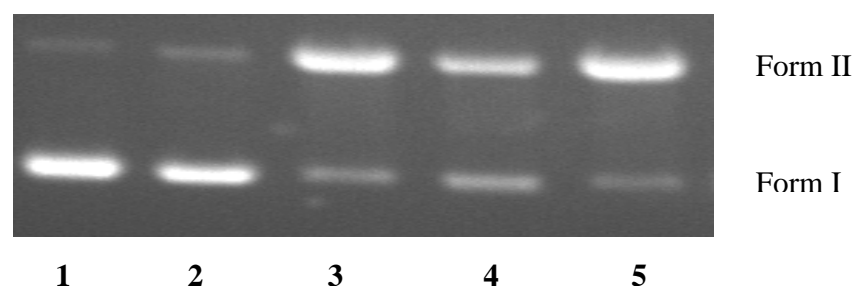



**Figure S15.** Cleavage of supercoiled pUC19 DNA (40  $\mu\text{M}$ ) by the copper(II) complexes in a 5 mM Tris-HCl/50 mM NaCl at pH = 7.1 and 37  $^{\circ}\text{C}$  in the presence of  $\text{H}_2\text{O}_2$  (200  $\mu\text{M}$ ) at 37  $^{\circ}\text{C}$ . Lane 1, DNA + 2  $\mu\text{L}$  DMSO; lane 2, DNA +  $\text{H}_2\text{O}_2$  + 2  $\mu\text{L}$  DMSO; lane 3, DNA + **1** +  $\text{H}_2\text{O}_2$  + 2  $\mu\text{L}$  DMSO; lane 4, DNA + **3** +  $\text{H}_2\text{O}_2$  + 2  $\mu\text{L}$  DMSO; lane 5, DNA + **2** +  $\text{H}_2\text{O}_2$  + 2  $\mu\text{L}$  DMSO; Complex concentration is 10  $\mu\text{M}$  for lanes 3-5. Forms I, II and are supercoiled, nicked circular forms of DNA, respectively.

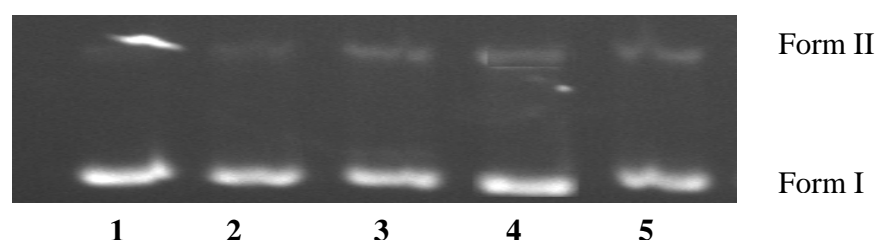

**Figure S16.** (A) Time dependent DNA (40  $\mu\text{M}$ ) cleavage by the complex **2** (10 – 60 min ) in 10% DMF / 5 mM Tris-HCl/50 mM NaCl at pH = 7.1 and 37  $^{\circ}\text{C}$  in the presence of  $\text{H}_2\text{O}_2$  (200  $\mu\text{M}$ ) at 37  $^{\circ}\text{C}$ . Lane 1, DNA +  $\text{H}_2\text{O}_2$ ; lane 2, DNA + **2** (10 min) +  $\text{H}_2\text{O}_2$ ; lane 3, DNA + **2** (20 min) +  $\text{H}_2\text{O}_2$ ; lane 4, DNA + **2** (30 min) +  $\text{H}_2\text{O}_2$ ; lane 5, DNA + **2** (40 min) +  $\text{H}_2\text{O}_2$ ; lane 6, DNA + **4** (50 min) +  $\text{H}_2\text{O}_2$ ; lane 7, DNA + **3** (60 min) +  $\text{H}_2\text{O}_2$ ; Forms I and II are supercoiled and nicked circular forms of DNA respectively.

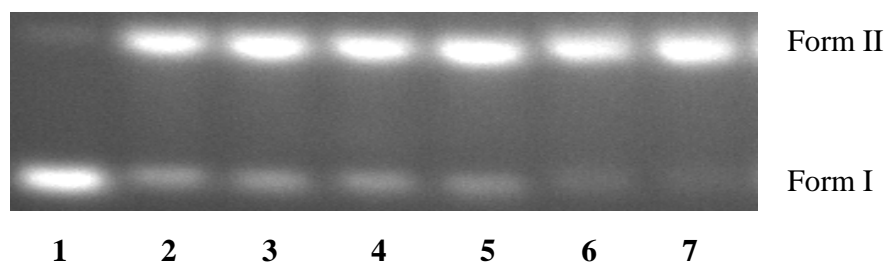

Supplement: b801497c.pdf [file b801497c.pdf]
